# Supplementary material for: Buffered delivery of phosphate to Arabidopsis alters responses to low phosphate
Source: PubMed Central journal article supplement (PMC6019003; doi:10.1093/jxb/erx454), 2018-01-03
Supplement: erx454_suppl_supplementary_figure_s1_and_table_s1.pdf [file erx454_suppl_supplementary_figure_s1_and_table_s1.pdf]

## Supplemental Materials and Methods

Nitrate reductase assay was determined following published methods (Cheeseman and Tankou, 2005). Protein concentration was determined via a Bradford assay (B6916 Sigma-Aldrich) using BSA as a standard.

Gel nutrient analysis was completed following drying (60°C for four days) and ashing (470°F for 8 hours) and digestion in 0.1N HCl. Digests were analyzed on an Agilent 730-ES, axial torch orientation (Agilent Technologies, Santa Clara, CA) following EPA method 6010.

Plant nutrient analysis was completed following drying (60°C for four days) and digestion in concentrated, ultra-pure nitric acid (HNO<sub>3</sub>) for 8 hours at 80°C in teflon vessels. The solution was diluted to obtain a final HNO<sub>3</sub> of 0.45 N. Samples were run on a Thermo Fisher Scientific XSeries 2 both with and without collision cell technology as required (srm 1640a, NIST 1547).

**Table S1:** Primers used in this study for qRT-PCR.

| Gene   | Forward                | Reverse                   | TAIR gene model |
|--------|------------------------|---------------------------|-----------------|
| Actin7 | GCCATTCAGGCCGTTCTTT    | ATCGAGCACAATACCGGTTGT     | At5g09810       |
| IRT1   | CGTTTCGTTCTCCAACCA     | CGGAGGCGAAACTTAATGA       | At4g19690       |
| Pht1;4 | GTGCCGGCCGAAATCTT      | AGAGATACCGTGGCAGGTTGA     | At2g38940       |
| PLDZ2  | TGGTGGTTATGTCCGGAGCTA  | AGCCGCAATGATGGATGATC      | At3g05630       |
| RNS1   | CTTGCCCAAGCGGTTTCAG    | GTACCATGCTTCTCCCATTCG     | At2g02990       |
| SPX1   | TGCCTTGCGGGTTTTGAA     | CGGCAATGAAAACACACTAACAGT  | At5g20150       |
| AT4    | GCCATCCCCTAAAGAACTGAA  | ACCCTTTATTGGTGAGATCTTCTGA | At5g03545       |
| FER1   | CTTTCACCGCCGCTAATCC    | GAGAAACCGACGGAGAAGCA      | At5g01600       |
| FRO2   | GTCTTGCCATTATCCGGTCTTG | TCGGGTTATGAAGGCTTCGA      | At1g01580       |

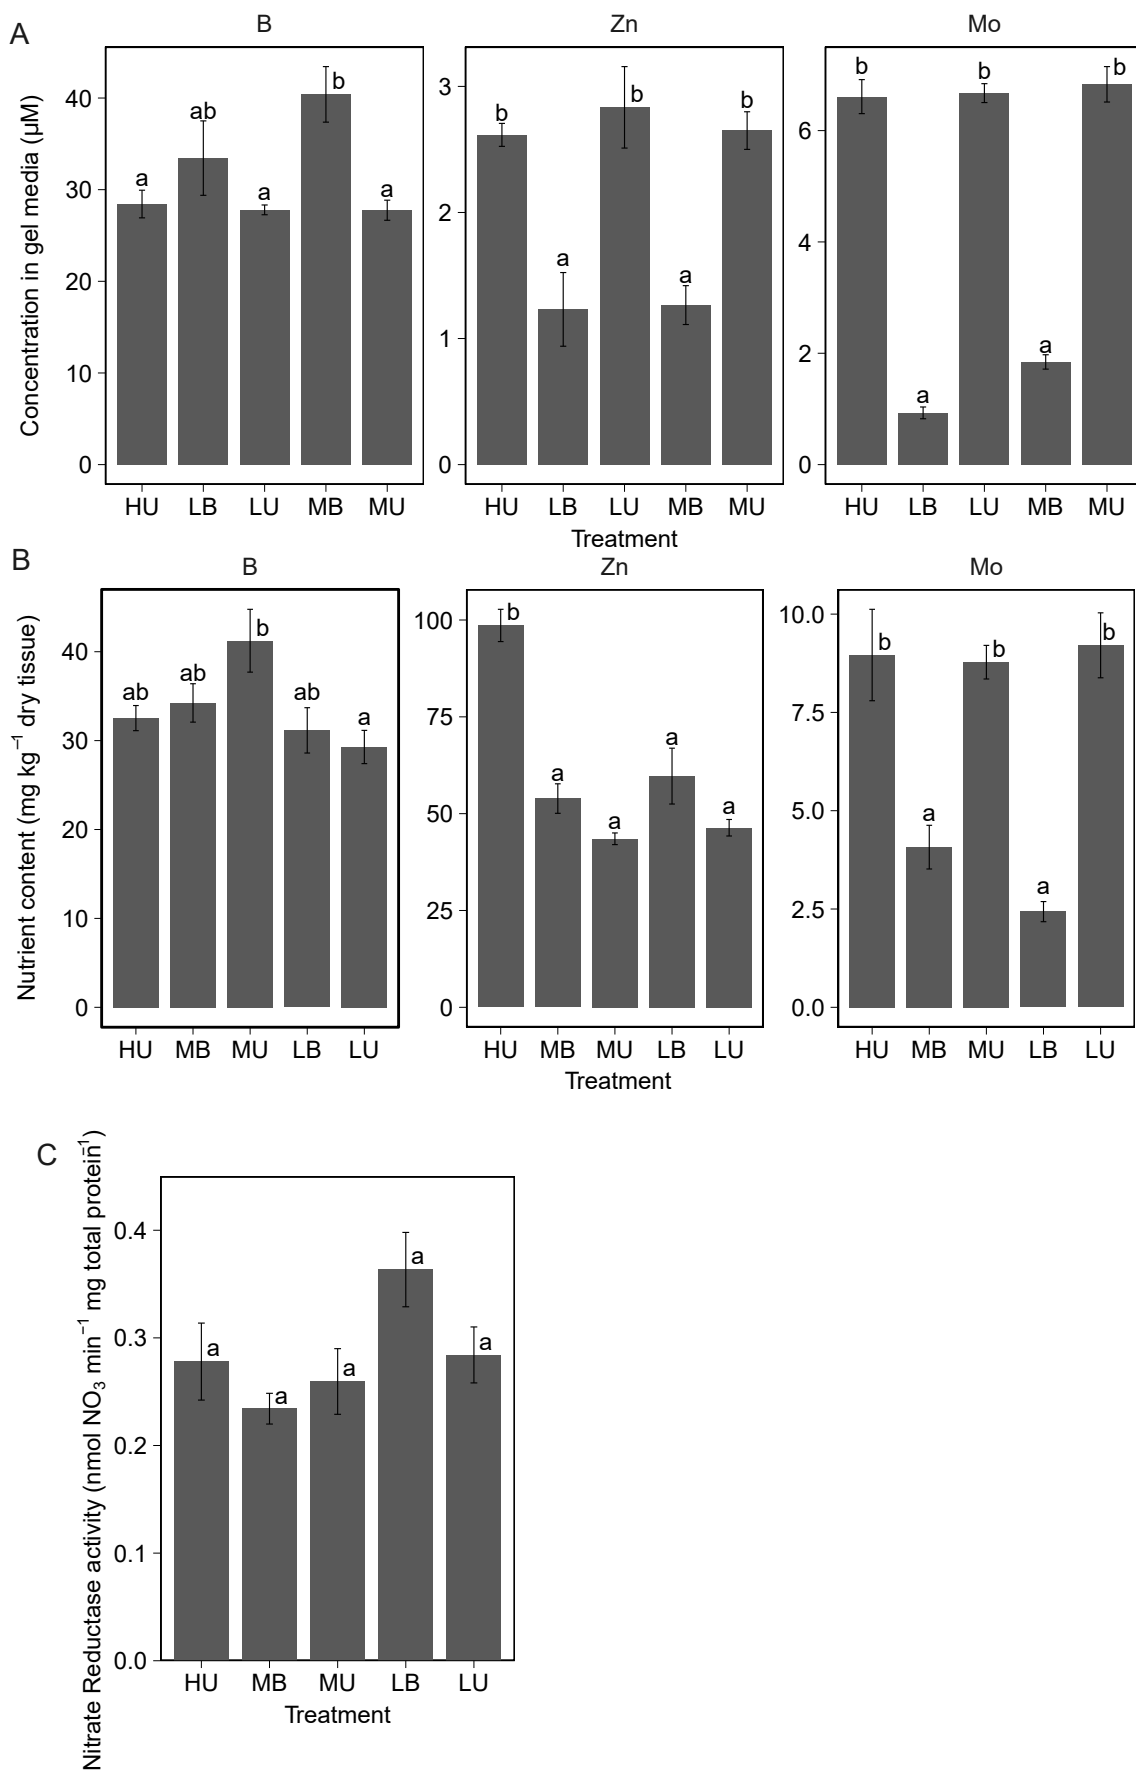

**Figure S1:** Micronutrient availability and plant content. A) Available B, Zn, and Mo in the gel media of each treatment. All levels were adjusted as described in Materials and Methods. Content was determined via ICP-AES of media without plants ( $n = 5$ ). B) Micronutrient content of shoots determined via ICP-MS ( $n = 5$ ). C) Nitrate reductase activity was measured to determine the presence of sufficient Mo ( $n = 5$ ).
